# Supplementary material for: Unlocking molecular mechanisms and identifying druggable targets in matched-paired brain metastasis of breast and lung cancers
Source: Front Immunol. 2023 Dec 12;14:1305644. doi: 10.3389/fimmu.2023.1305644 (PMC10750385; doi:10.3389/fimmu.2023.1305644)
Supplement: Supplementary file 2 [file Table_2.xlsx]

## Sheet: Table S3
Table S3. List of differentially expressed genes (adj.p < 0.05) in primary breast cancer
The table shows 281 DEGs upregulated in primary breast as compared to BM-BC.
Genes	Log2 fold change	P-value	adj.P-value
IGF2R	0.265	0.00361	0.0106
EZH2	0.319	0.00378	0.0109
AKT1	0.328	0.0173	0.0393
RPTOR	0.391	0.00413	0.0117
ZC3H12A	0.418	0.00847	0.0218
BAD	0.427	0.0109	0.0269
SBNO2	0.436	0.00108	0.00423
JAK1	0.452	0.000609	0.00267
MLH1	0.458	0.000421	0.00198
RELA	0.488	0.00169	0.00602
DAB2	0.49	0.0153	0.036
TNFRSF1A	0.491	0.00255	0.00813
BBC3	0.496	0.00954	0.0239
BRD3	0.508	0.00524	0.0142
ROCK1	0.517	0.000411	0.00196
PRR5	0.523	0.00708	0.0187
NECTIN2	0.523	0.00856	0.0219
CCND3	0.526	0.00342	0.0103
IKBKG	0.55	0.00331	0.01
TPM1	0.554	0.0211	0.0467
HDAC5	0.563	4.67e-05	0.000414
PIK3R1	0.569	0.00478	0.0134
PARP4	0.581	0.000151	0.000938
LRRC32	0.594	0.016	0.0367
CEP55	0.598	0.0156	0.0363
CD276	0.6	0.00227	0.00743
CLEC14A	0.607	0.00346	0.0104
KDR	0.618	0.0126	0.0305
MB21D1	0.63	0.0151	0.0356
CD58	0.639	0.00199	0.00666
NOTCH1	0.65	0.00896	0.0226
C5	0.654	0.0022	0.00727
DDB2	0.654	0.00328	0.01
IL11RA	0.661	0.0119	0.029
IL15	0.672	0.00969	0.0241
VHL	0.682	0.000385	0.00185
TLR3	0.686	0.0111	0.0272
NBN	0.689	0.0168	0.0383
IRF3	0.69	9.96e-06	0.000178
PALMD	0.69	0.012	0.0293
POLD1	0.699	6.04e-05	0.000487
IRF9	0.709	0.00353	0.0105
CASP8	0.711	0.000234	0.00129
STAT2	0.716	8.69e-05	0.00063
CDH5	0.721	0.00651	0.0173
NFATC2	0.732	0.0146	0.0346
TLR4	0.743	0.000273	0.00145
NOTCH2	0.752	0.000369	0.00178
MICB	0.753	0.018	0.0404
MYD88	0.771	0.00152	0.00554
IRF5	0.787	0.000518	0.00231
JAK2	0.801	0.00217	0.00724
SNAI1	0.807	0.0192	0.0428
SAMSN1	0.808	0.0158	0.0363
TNFSF13	0.813	0.00285	0.00883
IKBKB	0.821	0.00125	0.00473
NFKB1	0.825	0.000257	0.00138
CRABP2	0.839	0.0132	0.0319
CD14	0.843	0.00811	0.021
GMIP	0.844	4.29e-05	0.000396
PPARGC1B	0.845	0.00104	0.00414
BCL6B	0.845	0.00405	0.0116
ICAM3	0.846	0.000626	0.00271
SYK	0.856	0.000221	0.00123
PSMB8	0.877	0.00695	0.0184
IFIH1	0.877	0.00851	0.0218
FZD8	0.881	0.00302	0.00933
HLA-DMB	0.881	0.00874	0.0222
OAS3	0.887	0.0166	0.0379
PVRIG	0.894	0.000461	0.00211
NFKB2	0.905	6.53e-05	0.000504
TRIM21	0.906	0.000637	0.00272
TNFSF8	0.921	0.00811	0.021
TNFAIP3	0.924	0.00188	0.00646
TLR7	0.924	0.0072	0.0189
B2M	0.925	0.00113	0.00437
TMEM140	0.948	0.000525	0.00233
TNFAIP6	0.962	0.00181	0.00633
WNT5A	0.964	0.0019	0.00648
STAT1	0.967	0.00283	0.00883
CXorf36	0.981	0.000314	0.00163
IFITM1	0.981	0.00282	0.00883
CDH11	0.991	0.0146	0.0347
NFAM1	0.994	0.00126	0.00473
GPSM3	1	0.000651	0.00277
CCL2	1	0.0224	0.0491
TAP2	1.01	0.000808	0.00332
MFNG	1.01	0.0018	0.00633
ITGB2	1.01	0.00233	0.0075
MYCT1	1.02	0.000431	0.00201
FUT4	1.02	0.00129	0.00481
LAIR1	1.02	0.00195	0.0066
IL34	1.03	0.0115	0.0283
TAP1	1.04	0.00332	0.01
ITGAM	1.04	0.00379	0.0109
BATF3	1.04	0.00777	0.0203
NT5E	1.04	0.0122	0.0297
HCK	1.05	0.0016	0.00576
WNT10A	1.05	0.018	0.0404
HLA-E	1.06	4.13e-05	0.000386
OASL	1.06	0.0142	0.034
TNFSF12	1.07	0.000193	0.00109
CTSS	1.08	0.0015	0.00548
GLS	1.08	0.00238	0.0076
FPR3	1.08	0.00747	0.0196
FAS	1.09	5.18e-05	0.000449
IL6R	1.09	0.000188	0.00107
DUSP2	1.09	0.00144	0.00533
CD209	1.09	0.0157	0.0363
TAPBP	1.1	0.000108	0.000711
IFI16	1.11	0.00219	0.00727
TAPBPL	1.12	2.37e-06	7.93e-05
CD84	1.12	0.00118	0.00449
CX3CL1	1.12	0.00362	0.0106
TNFRSF14	1.13	0.000131	0.00084
SIGLEC1	1.13	0.00149	0.00548
TYMP	1.13	0.00311	0.00954
WNT5B	1.15	0.00498	0.0138
IFIT1	1.16	0.00965	0.0241
IFIT3	1.19	0.00062	0.0027
ISG15	1.2	0.0178	0.0403
GIMAP4	1.21	0.000181	0.00104
CCR5	1.21	0.00887	0.0225
MMRN2	1.22	6.19e-05	0.000492
GIMAP6	1.22	0.000171	0.00101
C2	1.22	0.00113	0.00437
PIK3CG	1.22	0.00185	0.00642
LILRA5	1.23	0.000708	0.00296
IRF8	1.23	0.00195	0.0066
HLA-DPB1	1.24	0.000363	0.00177
INHBA	1.24	0.00571	0.0153
IRF7	1.25	0.00111	0.00431
IL6	1.25	0.00502	0.0138
AXL	1.26	0.000633	0.00272
LILRB2	1.26	0.000675	0.00284
VSIR	1.28	0.000335	0.00171
IL10RA	1.29	0.000452	0.00208
TNFSF10	1.3	0.000465	0.00212
GBP2	1.31	4.03e-06	0.000106
MX1	1.31	0.00504	0.0138
HLA-DPA1	1.32	0.000739	0.00307
HLA-C	1.33	2.74e-05	0.000325
CSF1	1.33	0.00107	0.00422
AREG	1.33	0.0163	0.0372
PTGER4	1.34	0.000157	0.000962
PSMB10	1.35	7.52e-05	0.000561
TGFB3	1.35	0.000143	0.000899
RIPK3	1.36	1.53e-05	0.000218
TNFRSF25	1.36	2.89e-05	0.000331
HSD11B1	1.36	0.00123	0.00465
ADAM12	1.37	0.00157	0.00569
CASP1	1.38	8.07e-05	0.000591
HERC6	1.38	0.000491	0.00222
IL2RA	1.38	0.00188	0.00646
TMEM173	1.41	1.53e-05	0.000218
NLRP3	1.41	0.000164	0.000977
OAS2	1.41	0.00467	0.0131
CXCR4	1.42	7.64e-06	0.000156
SELE	1.43	0.00271	0.0086
DLL4	1.45	0.000162	0.000977
IL33	1.45	0.00184	0.00639
HLA-DRA	1.46	0.000175	0.00102
LILRB4	1.46	0.000516	0.00231
SELL	1.46	0.00353	0.0105
IFI35	1.47	0.000354	0.00175
IFI27	1.47	0.00953	0.0239
LGALS9	1.48	0.000108	0.000711
CD4	1.49	9.11e-05	0.000635
CYBB	1.49	0.000248	0.00135
PDGFRB	1.5	0.000355	0.00175
HLA-A	1.52	0.000175	0.00102
PLA2G2A	1.52	0.0228	0.0499
HLA-B	1.53	3.14e-05	0.000348
NLRC5	1.56	3.27e-05	0.000353
OLFML2B	1.56	5.38e-05	0.00045
CD38	1.57	0.00198	0.00666
TRAF1	1.6	7.26e-05	0.000548
TWIST1	1.6	0.000155	0.000959
TIE1	1.61	1.28e-05	0.000197
HLA-DMA	1.61	7.58e-05	0.000561
CCL8	1.62	0.00525	0.0142
CCR2	1.63	0.00229	0.00745
ITGAX	1.64	4.65e-05	0.000414
THY1	1.65	3.44e-05	0.000364
FAP	1.65	0.000203	0.00114
PDCD1LG2	1.65	0.000867	0.00352
COL5A1	1.65	0.00103	0.00412
HLA-DOB	1.65	0.00131	0.00485
DPP4	1.66	0.00492	0.0136
VEGFC	1.67	2.01e-05	0.000262
FOXP3	1.67	2.15e-05	0.000273
PSMB9	1.67	0.000162	0.000977
CD40	1.67	0.000268	0.00143
TGFB1	1.68	0.000129	0.000834
GBP1	1.72	5.37e-05	0.00045
STAT4	1.73	5.86e-05	0.000478
IL16	1.76	5.69e-05	0.00047
CD45RO	1.77	3.79e-05	0.000368
BIRC3	1.77	0.00075	0.0031
IRF1	1.79	3.47e-06	9.85e-05
CD80	1.79	0.00022	0.00123
PIK3CD	1.8	1.07e-05	0.000186
ROR2	1.81	2.71e-05	0.000325
HLA-F	1.86	1.25e-05	0.000197
HLA-DRB1	1.86	6.31e-05	0.000492
CD8B	1.87	0.000318	0.00163
APOL6	1.88	1.35e-05	0.000204
TNFRSF1B	1.89	6.83e-05	0.000521
MMP1	1.9	0.00644	0.0172
CD36	1.92	0.000296	0.00156
PTPRC	1.93	1.87e-05	0.000255
CD45RB	1.93	3.52e-05	0.000364
ITGA4	1.95	3.47e-06	9.85e-05
UBA7	1.95	3.97e-05	0.000376
LCK	1.95	4.84e-05	0.000424
TNFRSF18	1.97	0.000134	0.000852
RSAD2	2	1e-05	0.000178
GNLY	2	0.000305	0.00159
CD69	2.02	7.03e-06	0.000156
CXCL14	2.02	0.00114	0.00438
COL17A1	2.02	0.00231	0.00749
CD74	2.1	7.68e-06	0.000156
NID2	2.1	2e-05	0.000262
VCAM1	2.11	3.66e-05	0.000364
KLRK1	2.11	9.64e-05	0.000664
VCAN	2.11	0.000105	0.000704
MMP9	2.14	0.000237	0.00129
CD6	2.15	0.000349	0.00174
KLRD1	2.16	2.03e-05	0.000262
LAG3	2.17	8.92e-05	0.000634
IL32	2.19	0.000413	0.00196
GAS1	2.24	0.00177	0.00625
GZMB	2.29	0.0216	0.0479
ITGAL	2.3	1.96e-06	7.22e-05
CD8A	2.32	1.45e-05	0.000215
CXCL12	2.33	6.96e-06	0.000156
LYZ	2.34	7.39e-06	0.000156
GBP4	2.34	3.69e-05	0.000364
CD28	2.38	6.44e-06	0.000152
JAK3	2.38	1.15e-05	0.000195
CD2	2.41	1.28e-06	6.06e-05
IL2RG	2.41	2.47e-05	0.000308
IL7R	2.41	2.99e-05	0.000337
COL6A3	2.44	4.39e-05	0.0004
CSF2RB	2.46	3.55e-05	0.000364
NKG7	2.52	1.62e-05	0.000225
CTSW	2.53	1.28e-05	0.000197
KLRB1	2.57	1.91e-07	2.26e-05
ICOS	2.57	0.0222	0.049
SPIB	2.58	8.9e-05	0.000634
CXCL10	2.74	0.0001	0.000676
CCL5	2.75	8.77e-06	0.000168
ZAP70	2.8	3.92e-06	0.000106
CD48	2.82	1.13e-06	5.75e-05
CCL14	2.89	2.01e-06	7.22e-05
CD27	2.94	2.46e-06	7.93e-05
SFRP4	2.99	6.37e-09	4.52e-06
CD7	3.06	1.06e-07	1.88e-05
IL2RB	3.08	3.38e-06	9.85e-05
CD5	3.09	5.86e-06	0.000143
MS4A1	3.14	3.69e-05	0.000364
IRF4	3.15	2.03e-06	7.22e-05
IDO1	3.19	8.78e-06	0.000168
CD96	3.21	1.07e-06	5.75e-05
CD3E	3.31	6.61e-07	4.69e-05
GZMK	3.37	3.9e-07	3.46e-05
SH2D1A	3.42	1.69e-06	7.05e-05
CD3D	3.44	4.84e-07	3.82e-05
CTLA4	3.54	7.53e-08	1.78e-05
TIGIT	3.64	7.83e-07	5.05e-05
TPSAB1/B2	3.76	1.13e-06	5.75e-05
CD79A	3.76	1.24e-05	0.000197
CXCL11	3.78	3.28e-05	0.000353
CPA3	3.85	9.78e-05	0.000668
COMP	3.86	9.72e-06	0.000178
CD45RA	4.11	3.23e-07	3.28e-05
CXCL13	4.21	2.66e-05	0.000325
LTB	4.22	1.43e-06	6.34e-05
CXCL9	4.24	4.92e-06	0.000125
CCL21	5.87	1.61e-07	2.26e-05
CCL19	6.69	1.41e-08	4.99e-06

## Sheet: Table S4
Table S4. List of differentially expressed genes (adj.p < 0.05) in BM-BC
The table shows 43 DEGs upregulated in BM-BC as compared to primary breast.
Genes	Log2 fold change	P-value	adj.P-value
NCAM1	-3.15	2.89e-05	0.000331
SOX2	-3	9.13e-05	0.000635
IL1A	-2.41	0.00409	0.0117
CXCL6	-2.08	0.00491	0.0136
RASGRF1	-1.7	6.25e-05	0.000492
PRKAA2	-1.6	0.000959	0.00385
SPP1	-1.48	0.00283	0.00883
ARG2	-1.45	0.00519	0.0142
ULBP2	-1.44	0.000339	0.00172
ALDOC	-1.41	0.000581	0.00256
SLC16A1	-1.37	3.9e-05	0.000374
SNCA	-1.31	0.00177	0.00625
LDHA	-1.21	0.000364	0.00177
MAPK10	-1.16	0.00785	0.0204
BNIP3L	-1.15	0.00328	0.01
P4HA1	-1.12	0.000451	0.00208
COL11A2	-1.08	0.018	0.0404
ITGB8	-1.06	0.000676	0.00284
CCNO	-1.02	0.00529	0.0143
CDH2	-0.991	0.00991	0.0246
APH1B	-0.964	0.00413	0.0117
TNFRSF10C	-0.942	5.34e-05	0.00045
CD163	-0.933	0.01	0.0248
BNIP3	-0.901	0.00285	0.00883
PDK1	-0.896	0.000859	0.00351
TTC30A	-0.892	0.00371	0.0108
ERO1A	-0.857	0.00357	0.0106
HK2	-0.784	0.00223	0.00733
SLC7A5	-0.75	0.00233	0.0075
PRKACB	-0.663	0.0155	0.0363
PFKM	-0.658	0.00167	0.00598
CDC20	-0.641	0.00465	0.0131
MXI1	-0.571	0.0143	0.0341
OAZ1	-0.562	0.00372	0.0108
KIF2C	-0.544	0.0157	0.0363
BLM	-0.543	0.000342	0.00172
GOT1	-0.509	0.00358	0.0106
PMS2	-0.459	0.000925	0.00373
MSH2	-0.414	0.000124	0.000808
SFXN1	-0.398	0.00561	0.0151
PTCD2	-0.385	0.0143	0.0341
PKM	-0.348	0.0187	0.0418
BBS1	-0.306	0.0156	0.0363

## Sheet: Table S5
Table S5. List of differentially expressed genes (adj.p < 0.05) in primary LUAD
The table shows 226 DEGs upregulated in primary LUAD as compared to BM-LUAD.
Genes	Log2 fold change	P-value	adj.P-value
STAT2	0.369	0.0048	0.0205
PARP12	0.373	0.0013	0.0113
NFKB1	0.387	0.00838	0.0296
NOTCH2	0.415	0.013	0.0416
BRD4	0.421	0.013	0.0416
ROCK1	0.428	0.00413	0.0185
MAP3K7	0.429	0.00372	0.0177
PIAS4	0.434	0.0107	0.0359
MLH1	0.454	0.00205	0.0134
MICA	0.48	0.008	0.0284
OASL	0.48	0.012	0.0388
TRIM21	0.481	0.0158	0.0472
CASP8	0.498	0.0161	0.0479
MB21D1	0.538	0.012	0.0388
SYK	0.547	0.014	0.0436
NBN	0.557	0.00232	0.0142
IFNGR1	0.578	0.0128	0.0414
TNFAIP3	0.647	0.00202	0.0134
OAS2	0.654	0.0104	0.035
DAB2	0.668	0.00312	0.016
MAML2	0.669	0.0102	0.0349
ICAM3	0.708	0.0141	0.0438
PIK3R5	0.727	0.0104	0.035
TFRC	0.728	0.0033	0.0163
NOTCH1	0.728	0.00787	0.0282
IL11RA	0.732	0.00189	0.0132
TAP1	0.735	0.00642	0.0242
TNFSF13B	0.744	0.00154	0.0116
ITGAM	0.745	0.0165	0.0488
B2M	0.753	0.00912	0.0314
HLA-E	0.774	0.00283	0.0153
PSMB8	0.774	0.00364	0.0177
TYMP	0.787	0.0151	0.0458
HLA-DMB	0.792	0.0168	0.0495
TAPBP	0.805	0.0103	0.035
FAS	0.835	0.00222	0.014
CNTFR	0.847	0.017	0.0498
CTSS	0.859	0.0116	0.0383
IFI35	0.87	0.00987	0.0338
GHR	0.886	0.00577	0.0226
TAP2	0.886	0.0172	0.05
FPR3	0.909	0.00065	0.0087
ZEB2	0.92	0.00545	0.0219
CASP1	0.922	0.017	0.0498
PIK3CD	0.94	0.00552	0.022
RELB	0.952	0.00144	0.0114
TAPBPL	0.958	0.00139	0.0114
VTCN1	0.96	0.00682	0.025
LAIR1	0.962	0.00848	0.0296
ENTPD1	0.968	0.00194	0.0132
PECAM1	0.989	0.00435	0.0192
IL15	0.991	0.00397	0.0182
GIMAP4	0.991	0.00645	0.0242
IKBKB	1	0.000204	0.00744
MYCT1	1.01	0.00669	0.0247
TPM1	1.02	0.00562	0.0222
STAT4	1.02	0.00801	0.0284
LCK	1.03	0.0152	0.0458
PDGFRB	1.03	0.016	0.0476
TNFSF10	1.04	0.00464	0.02
NFKB2	1.05	0.00191	0.0132
LILRB2	1.05	0.00486	0.0205
HLA-B	1.05	0.00535	0.0219
PALMD	1.08	0.00144	0.0114
PDCD1LG2	1.08	0.00247	0.0144
SAMSN1	1.08	0.00456	0.0198
CDH5	1.08	0.00518	0.0214
MMRN2	1.09	9.32e-05	0.00682
THBS1	1.09	0.000739	0.00877
HCK	1.1	0.00755	0.0272
GBP2	1.11	0.00374	0.0177
VEGFC	1.11	0.0043	0.0191
NGFR	1.11	0.0131	0.0416
CD4	1.12	0.0139	0.0436
PSMB10	1.13	0.00601	0.0233
BAMBI	1.14	0.000145	0.00741
CD84	1.14	0.00385	0.018
HLA-DRA	1.14	0.00388	0.018
LRRC32	1.16	0.00175	0.0126
TNFRSF14	1.17	0.0013	0.0113
TRAF1	1.2	0.00665	0.0247
CD74	1.23	0.0149	0.0458
CD44	1.24	0.00131	0.0113
PIK3CG	1.3	0.00241	0.0144
APOE	1.3	0.00667	0.0247
CD45RO	1.31	0.00338	0.0166
TIE1	1.31	0.00368	0.0177
LTBP1	1.32	0.000392	0.00813
THY1	1.32	0.00403	0.0182
LILRA5	1.32	0.0144	0.0445
NFATC2	1.33	0.000311	0.00806
TNFAIP6	1.34	0.00487	0.0205
PTGER4	1.35	0.000907	0.00938
IL32	1.35	0.00725	0.0265
IL7R	1.36	0.00248	0.0144
CYBB	1.36	0.00319	0.0161
CCR5	1.38	0.00135	0.0113
OLR1	1.38	0.00308	0.016
GLI1	1.38	0.0118	0.0385
JAK3	1.39	0.000863	0.00938
LAG3	1.39	0.0139	0.0436
IL10RA	1.41	0.000963	0.00971
VCAN	1.41	0.00194	0.0132
CD274	1.41	0.00567	0.0223
PSMB9	1.42	0.00202	0.0134
IL34	1.42	0.00505	0.0211
CCL22	1.42	0.0111	0.037
TGFB3	1.43	0.00405	0.0182
IRF8	1.45	0.00328	0.0163
WNT11	1.47	0.00454	0.0198
PRF1	1.47	0.0152	0.0458
CXCR4	1.49	0.000759	0.00877
FGFR1	1.5	9.14e-05	0.00682
MMP7	1.52	0.0118	0.0385
PDCD1	1.53	0.00608	0.0234
PTPRC	1.54	0.000665	0.0087
ITGA4	1.54	0.00222	0.014
CD45RB	1.55	0.00205	0.0134
A2M	1.56	0.00118	0.0111
HLA-F	1.56	0.00516	0.0214
CCL5	1.63	0.00635	0.0241
CXCR3	1.66	0.00545	0.0219
CTSW	1.68	0.00743	0.027
CCR4	1.69	0.000464	0.00813
GZMM	1.69	0.00285	0.0153
CXCR6	1.71	0.00267	0.0148
TRAT1	1.71	0.00894	0.0309
IRF1	1.73	0.000379	0.00813
CD38	1.73	0.00438	0.0192
KLRK1	1.76	0.000651	0.0087
NLRC5	1.77	0.000126	0.00741
ID4	1.79	1.5e-05	0.00357
COL6A3	1.8	0.000586	0.00852
CXCL10	1.81	0.00169	0.0125
EOMES	1.82	0.000545	0.00813
KLRB1	1.82	0.0031	0.016
ITGAX	1.83	0.00044	0.00813
CD244	1.83	0.00134	0.0113
CD8A	1.83	0.0014	0.0114
MARCO	1.83	0.00266	0.0148
CCL2	1.85	0.000717	0.0087
CD69	1.86	0.000867	0.00938
LY9	1.87	0.00223	0.014
IL2RB	1.87	0.00229	0.0142
TNFRSF8	1.87	0.0055	0.022
FOXP3	1.88	0.00135	0.0113
CXCL11	1.89	0.000656	0.0087
IL16	1.91	0.000526	0.00813
GBP1	1.92	0.000247	0.00806
CD96	1.92	0.000501	0.00813
CD28	1.92	0.00167	0.0125
CLECL1	1.93	0.000265	0.00806
CD7	1.93	0.00376	0.0177
C7	1.94	0.00477	0.0205
IL6	1.97	0.00246	0.0144
CD247	1.97	0.00537	0.0219
CD19	1.98	0.00287	0.0153
CSF2RB	2.01	0.00106	0.0104
CD1C	2.01	0.00611	0.0234
IL2RG	2.02	0.000512	0.00813
WNT2	2.04	0.00327	0.0163
CD3D	2.05	0.00154	0.0116
ITGAL	2.06	0.000878	0.00938
CD3E	2.09	0.00145	0.0114
GBP4	2.1	0.000385	0.00813
GZMA	2.1	0.0025	0.0144
SFRP1	2.12	9.52e-05	0.00682
IL21R	2.15	0.00148	0.0114
ROR2	2.18	0.00206	0.0134
HLA-DQB1	2.18	0.00294	0.0154
HLA-DOB	2.21	0.00219	0.014
CD36	2.22	0.000883	0.00938
LYZ	2.24	0.000706	0.0087
CD79B	2.24	0.00295	0.0154
NKG7	2.27	0.00091	0.00938
TNFRSF9	2.27	0.00266	0.0148
VCAM1	2.28	0.000208	0.00744
CD6	2.28	0.00112	0.0108
MS4A2	2.28	0.00372	0.0177
CXCL9	2.3	0.00255	0.0146
ICOS	2.33	0.000315	0.00806
MMP9	2.33	0.00136	0.0113
SPIB	2.33	0.00176	0.0126
TDO2	2.34	0.00243	0.0144
FCN1	2.35	0.000294	0.00806
CD5	2.41	0.000989	0.00983
FASLG	2.43	0.00391	0.018
SH2D1A	2.46	0.000511	0.00813
SELE	2.49	0.000195	0.00744
GZMK	2.49	0.000314	0.00806
CTLA4	2.5	0.000751	0.00877
HDC	2.54	0.00132	0.0113
SFRP4	2.56	0.00054	0.00813
TIGIT	2.57	0.000528	0.00813
HSD11B1	2.59	0.000375	0.00813
BLK	2.59	0.000438	0.00813
ZAP70	2.61	0.000333	0.00813
CXCL12	2.64	0.00148	0.0114
CD48	2.65	0.000162	0.00744
GAS1	2.65	0.000519	0.00813
FAM30A	2.65	0.00123	0.0113
CD40LG	2.65	0.00172	0.0126
FCRL2	2.65	0.00293	0.0154
CCL18	2.77	0.000691	0.0087
CXCL14	2.78	0.000525	0.00813
CPA3	2.91	0.000468	0.00813
IDO1	2.92	0.000595	0.00852
CD27	2.96	0.000143	0.00741
SLAMF7	2.97	0.00114	0.0109
CD45RA	3.04	0.000544	0.00813
HLA-DQA2	3.15	0.000697	0.0087
TNFRSF17	3.19	0.000109	0.00712
TPSAB1/B2	3.22	0.000275	0.00806
IL33	3.22	0.0013	0.0113
IRF4	3.25	0.000177	0.00744
LTB	3.26	0.000687	0.0087
CCL14	3.3	5.05e-05	0.00682
SELP	3.33	2.28e-06	0.00163
COMP	3.41	0.000187	0.00744
GZMB	3.49	0.000257	0.00806
MMP1	3.57	0.000917	0.00938
MS4A1	3.59	5.27e-05	0.00682
CD79A	3.61	6.6e-05	0.00682
PLA2G2A	3.89	7.23e-05	0.00682
CCL21	5.3	0.0143	0.0445
CCL19	6.46	5.88e-06	0.00211

## Sheet: Table S6
Table S6. List of differentially expressed genes (adj.p < 0.05) in BM-LUAD
The table shows 20 DEGs upregulated in BM-LUAD as compared to primary LUAD.
Genes	Log2 fold change	P-value	adj.P-value
FZD9	-1.82	0.00582	0.0226
NCAM1	-1.61	0.00543	0.0219
ARG2	-1.26	0.00286	0.0153
RASAL1	-1.26	0.0152	0.0458
BNIP3	-1.19	0.000905	0.00938
ANGPTL4	-1.17	0.00867	0.0301
PRKAA2	-1.17	0.0115	0.0383
ERO1A	-1.16	0.00189	0.0132
P4HA1	-1.11	0.00319	0.0161
TTC30A	-1.09	0.000403	0.00813
F2RL1	-1.01	0.00751	0.0272
LDHA	-0.977	0.00614	0.0234
ALDOC	-0.894	0.00233	0.0142
TLR5	-0.728	0.004	0.0182
GOT1	-0.653	0.00848	0.0296
BCL2L1	-0.6	0.0156	0.0469
HK2	-0.598	0.0131	0.0417
ENO1	-0.459	0.00262	0.0148
HDAC3	-0.423	0.00249	0.0144
PFKM	-0.37	0.00274	0.0151
